# Supplementary material
Source: publisher figshare collection journal article supplement (https://acs.figshare.com/ndownloader/files/3831805)
Supplement: Supplementary file 1 [file 3831805]

# Supporting Information

## Temperature-Dependent Resonance Energy Transfer from Semiconductor Quantum Wells to Graphene

Young-Jun Yu, Keun Soo Kim, Jungtae Nam, Se Ra Kwon, Hyeryoung Byun, Kwanjae Lee, Jae-Hyun Ryou, Russell D. Dupuis, Jeomoh Kim, Gwanghyun Ahn, Sunmin Ryu, Mee-Yi Ryu and Jin Soo Kim

### 1. Raman spectra of 4-layer graphene on QWs before and after annealing treatment

Although we transferred multiple-layer graphene on the QWs, the Raman spectrum exhibits a fingerprint of a single-layer graphene (SLG) with the intensity ratio of 0.5 between G and 2D peaks ( $I_G/I_{2D}$ ), ascribing to the isolation between the stacked graphene layers on QWs as shown in Fig. S1a. Thus, utilizing the annealing process at 250 °C in Ar atmosphere (100 sccm) for 2 hours, we removed the polymer residues and stiffened the bonding condition between each stacked graphene layer leading to the fingerprint ( $I_G/I_{2D} = 2$ ) of the quadruple-layer graphene (QLG), as shown in Fig. S1b. As a result, figure 1b presents the Raman spectra of the different numbers of graphene layers leading to the  $I_G/I_{2D}$  ratios of 1, 1.5, and 2 for bi-layer graphene (BLG), triple-layer graphene (TLG), and quadruple-layer graphene (QLG) after the annealing process, respectively. Since the Raman peaks of bare InGaN/GaN QW in Fig. S1c appear at 418.6  $\text{cm}^{-1}$ , 569.2  $\text{cm}^{-1}$  and 735.4  $\text{cm}^{-1}$  for sapphire substrate,  $E_2^H$  phonon mode and  $A_1(\text{LO})$  mode, respectively, there is no overlap between the Raman spectrum of QW and graphene in the range of  $\sim 1500 - 3000 \text{ cm}^{-1}$  [32, 33]. The Bernal stacking of multilayer graphene has a fingerprint as the 2D Raman peak shows broadening with increasing number of layers. Especially, while the 2D peak of SLG fitted by a single Lorentzian peak is reported as the full width at half maximum (FWHM) of  $\sim 24 \text{ cm}^{-1}$ , the 2D peak of multi-layer graphene from BLG to QLG fitted by multi-Lorentzian peaks exhibits the FWHM of 45-60  $\text{cm}^{-1}$ , which is broader than that of SLG [31, 32]. In case of our 2D Raman peaks shown in Fig. 1b, the 2D peaks of SLG, BLG, TLG and QLG on QW, sapphire or  $\text{SiO}_2$  substrate are fitted by a single Lorentzian peak with the FWHM of 30~48  $\text{cm}^{-1}$  as shown in Fig. S1f, g and h. Although the FWHM extracted from the 2D Raman peaks in Fig. 1b is slightly larger than the reported one, all 2D peaks fitted by a single Lorentzian peak leading

to smaller FWHM than  $45 - 60 \text{ cm}^{-1}$  allow us to confirm that our multi-layer graphene is not Bernal stacked but randomly stacked.

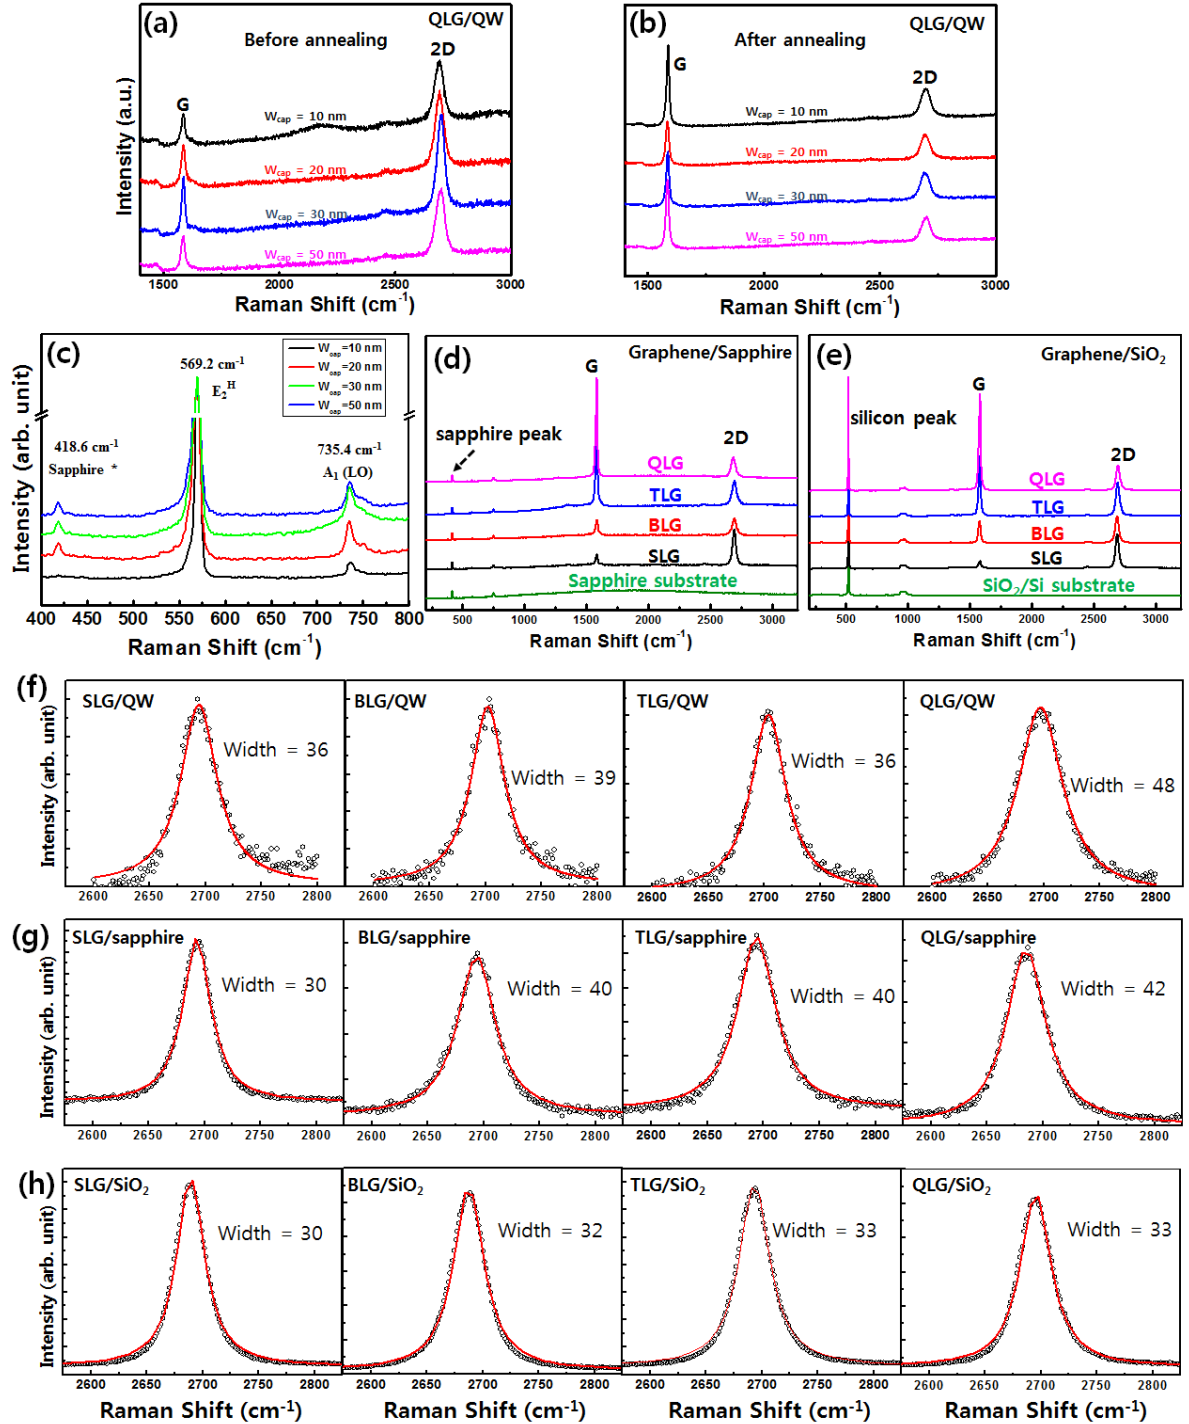

**Figure S1.** Raman spectra of QLG on QWs (a) before and (b) after annealing treatment. (c) Raman spectra of bare InGaN/GaN QW on sapphire substrate with  $W_{\text{cap}}=10, 20, 30$  and  $50 \text{ nm}$ . Raman spectra of SLG, BLG, TLG and QLG on (d) sapphire substrate and (e) SiO<sub>2</sub>

substrate. The single Lorentzian fitted 2D peaks for SLG, BLG, TLG, QLG on (f) QW of Fig. 1b, (g) sapphire substrate of Fig S1d and (h) SiO<sub>2</sub> substrate of Fig S1e.

31. Ferrari, A. C.; Meyer, J. C.; Scardaci, V.; Casiraghi, C.; Lazzeri, M.; Mauri, F.; Piscanec, S.; Jiang, D.; Novoselov, K. S.; Roth, S.; Geim, A. K. Raman spectrum of graphene and graphene layers. *Phys. Rev. Lett.* **2006**, 97, 187401.

32. Ji, L. W.; Lam, K. T.; Su, Y. K.; Kao, Y. K.; Diao, C. C.; Liao, F. C. Raman study of biaxial strain in InGa<sub>N</sub>-Ga<sub>N</sub> self assembled quantum dots grown on sapphire(0001). *Inst. Phys. Conf. Ser.* **2004**, 184, 451-454.

33. Feng, Z. C.; Wang, W.; Chua, S. J.; Zhang, P. X.; Williams, K. P. J.; Pitt, G. D. Raman scattering properties of Ga<sub>N</sub> thin films grown on sapphire under visible and ultraviolet excitation. *J. Raman Spectrosc.* **2001**, 32, 840-846.

34. Malard, L. M.; Pimenta, M. A.; Dresselhaus, G.; Dresselhaus, M. S. Raman spectroscopy of graphene. *Phys. Rep.* **2009**, 473, 51-87.

## 2. Electric doping condition of CVD-SLG.

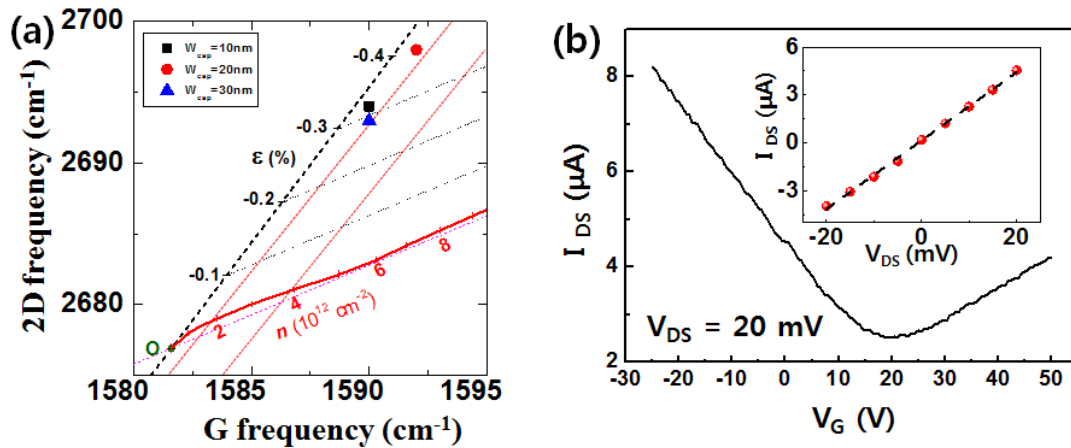

**Figure S2.** (a) Raman 2D frequency ( $\omega_{2D}$ ) vs. G frequency ( $\omega_G$ ) of SLG on the QWs compared with the origin  $O(\omega_G, \omega_{2D}) = (1581.5, 2677)$  of graphene under natural condition without external influences such as charge impurity and mechanical strain. Regardless of the capping layer thickness ( $W_{\text{cap}}$ ) of the QWs, each SLG on the QWs exhibits the hole-doped condition with a carrier density of  $n \sim 2.0 \times 10^{12} \text{ cm}^{-2}$  and compressive strain ( $-0.3 \leq \epsilon \leq -0.4$ ) due to charged residues on the surface and lattice mismatch with the QWs [35]. Here, the effect of mechanical strain by graphene on QWs can be neglected due to the ultrathin graphene thickness (0.3 nm) compared to that of multiple-QWs ( $> \sim 100 \text{ nm}$ ). (b) Current ( $I_{\text{DS}}$ ) variation of SLG on  $\text{SiO}_2$  as a function of gate voltage ( $V_G$ ) while applying bias voltage ( $V_{\text{DS}} = 20 \text{ mV}$ ). A charge carrier density of  $n = 1.4 \times 10^{12} \text{ cm}^{-2}$  is calculated from  $n = (C/e) \cdot V_{\text{CNP}}$ , where  $C$ ,  $e$ , and  $V_{\text{CNP}}$  are capacitance with a value of  $12 \text{ nF/cm}^2$  for 300-nm-thick  $\text{SiO}_2$ , electron charge, and a charge neutral point voltage of  $\sim 20 \text{ V}$ , respectively. Inset:  $I_{\text{DS}} - V_{\text{DS}}$  characterization curve. Here, the red dots represent the experimental results and the dashed line is a fitted line. To avoid the influence of additional charge carriers during device fabrication such as e-beam lithography and metal contact process, we measured the electron transport characterization of the transferred CVD graphene on  $\text{SiO}_2$  substrate using simple two-terminal indium contacts.

35. Lee, J. E.; Ahn, G.; Shim, J.; Lee, Y. S.; Ryu S. Optical separation of mechanical strain from charge doping in graphene. *Nat. Commun.* **2012**, 3,1024.

### 3. PL spectra of bare QWs and graphene/QWs with different cap-layer thickness measured at 10 K.

As shown in Fig. S3e, the energy variation of the dominant PL peaks (i.e. effective band gap variation  $\Delta E_G = E_{G0} - E_{G1}$ ) of QWs with different  $W_{\text{cap}}$  as a function of the number (N) of graphene layers shows a red-shifted trend whereby the  $\Delta E_G$  increases to  $\sim 70$  meV due to increasing N, where  $E_{G0}$  and  $E_{G1}$  are the PL energies of bare QW and graphene/QW, respectively. The deviation range of  $\Delta E_G$  represented by the gray area in Fig. S3e could be calculated from  $\Delta E_G = -N \cdot (e \times F \times L_w)$  [37-39] with the electric field (F) from 8 to 120 kV/cm induced by the accumulated charge carrier density from  $6 \times 10^{10}$  to  $1.3 \times 10^{12} \text{ cm}^{-2}$  on stacked graphene. Here, the electric field  $F (=V/d)$  induced by the charge carrier density on graphene can be extracted from  $n = (C/e) \times V = (V/d) \times [(\epsilon \cdot \epsilon_0)/e]$ , where  $C = \epsilon \cdot \epsilon_0/d$ ,  $\epsilon$ ,  $\epsilon_0$ ,  $d$ , and  $e$  correspond to the capacitance, dielectric constant of InGaN ( $\epsilon = 14.6$ ) [38, 39], vacuum permittivity, distance for capacitance, and electron charge, respectively. Zhu et al. reported a steady elevation of carrier density at the Dirac point as increasing number of layers. [30] Following this behavior, the gradual escalation of the carrier density in graphene could be expected from SLG leading to  $1.3 \sim 2.0 \times 10^{12} \text{ cm}^{-2}$  in Fig. S2 and S3 to BLG, TLG and QLG. Thus QLG could be assumed to be in the range of  $4.0 \sim 6.0 \times 10^{12} \text{ cm}^{-2}$  by adding carrier densities of layer by layer of graphene. This indicates that the rearranging Fermi energy level due to the different work functions between hole-accumulated graphene and InGaN/GaN QWs [40-42] results in an increase of the quantum confined Stark effect (QCSE), which causes the reduced band gap of QW.

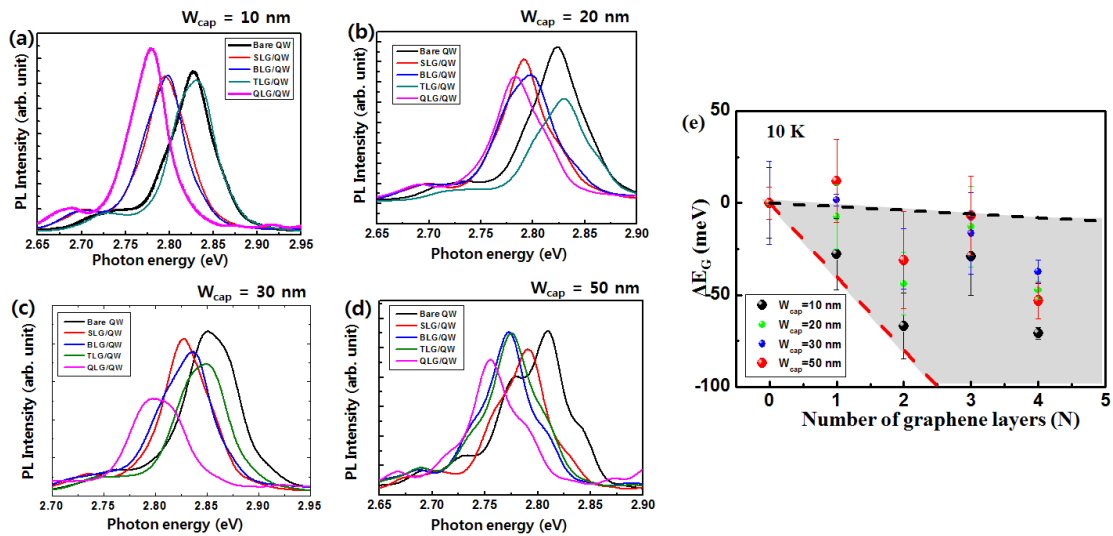

**Figure S3.** PL spectra of bare QWs, SLG/QW, BLG/QW, TLG/QW, and QLG/QWs with  $W_{\text{cap}} =$  (a) 10 nm, (b) 20 nm, (c) 30 nm, and (d) 50 nm at 10 K. The PL photon energy is perturbed at around  $\sim 2.82$  and  $2.77$  eV as the number of graphene layers escalates from 1 to 4 on QWs with 10, 20, 30, and 50 nm thick cap-layers. However, when we plot the PL photon energy deviation (i.e., band gap variation  $\Delta E_G$ ) as a function of the number of graphene layers, we could observe a red-shifted trend whereby the  $\Delta E_G$  decreases the amount of  $\sim 70$  meV by escalating the number of graphene layers from 0 to 4 as shown in Fig. 1c. (e) PL peak energies of QWs with different cap-layer thicknesses (10, 20, 30, and 50 nm) as a function of the number of graphene layers ( $N = 0 - 4$ ). Gray area represents the deviation of  $\Delta E_G$  decreased by  $N$  with black and red dashed boundary lines which are fitted by the electric fields of 8 and 120 kV/cm induced by charge carrier densities of  $6 \times 10^{10}$  and  $1.3 \times 10^{12} \text{ cm}^{-2}$ , respectively.

30. Zhu, W.; Perebeinos, V.; Freitag, M.; Avouris P. Carrier scattering mobilities, and electrostatic potential in monolayer, bilayer, and trilayer graphene. *Phys. Rev. B* **2009**, *80*, 235402.
37. Hangleiter, A.; Im, J. S.; Off, J.; Scholz, F. Optical properties of Nitride quantum wells: How to separate fluctuations and polarization field effects. *Phys. Stat. Sol.(b)* **1999**, *216*, 427-430.
38. Qian, F.; Brewster, M.; Lim, S. K.; Ling, Y.; Greene, C.; Laboutin, O.; Johnson, J. W.; Gradecak S.; Cao, Y.; Li, Y. Controlled synthesis of AlN/GaN multiple quantum well nanowire structures and their optical properties. *Nano Lett.* **2012**, *12*, 3344-3350.
39. Perlin, P.; Kisielowski, C.; Iota, V.; Weinstein, B. A.; Mattos, L.; Shapiro, N. A.; Kruger, J.; Weber, E. R.; Yang, J. InGa<sub>N</sub>/Ga<sub>N</sub> quantum wells studied by high pressure, variable temperature, and excitation power spectroscopy. *App. Phys. Lett.* **1998**, *73*, 2778-2780.
40. Yu, Y. -J.; Zhao, Y.; Ryu, S.; Brus, L. E.; Kim, K. S.; Kim, P. Tuning the graphene work function by electric field effect. *Nano Lett.* **2009**, *9*, 3430-3434.
41. Pankove, J. I.; Schade, H. Photoemission from GaN. *App. Phys. Lett.* **1974**, *25*, 53-55.
42. Foresi, J. S.; Moustakas, T. D. Metal contacts to gallium nitride. *App. Phys. Lett.* **1993**, *62*, 2959-2861.

#### 4. Induced quantum confined Stark effect of QW by graphene.

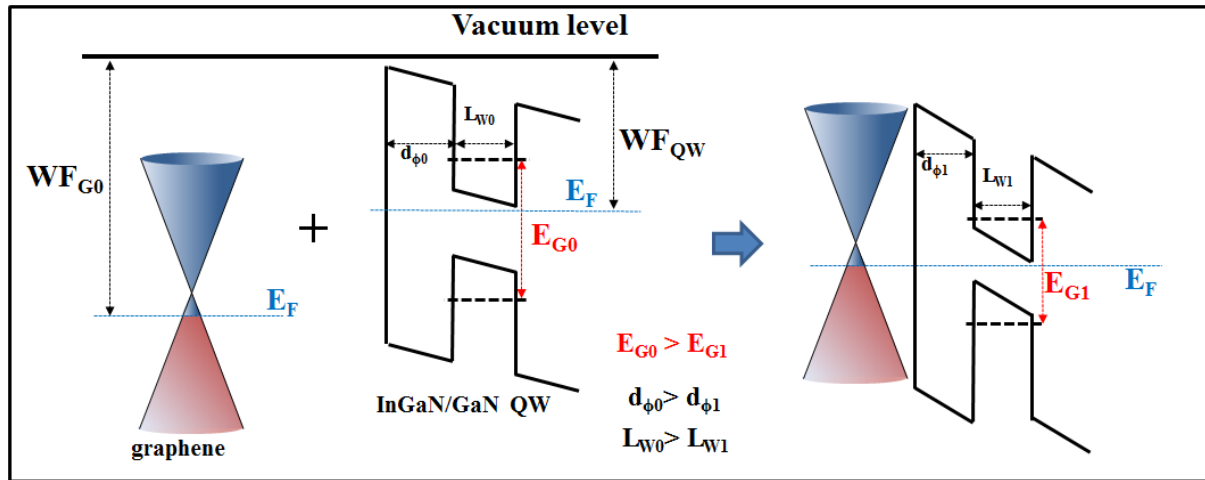

**Figure S4.** Schematic illustration of the quantum confined Stark effect (QCSE) of QW by covering the hole-doped graphene.  $WF_{G0}$ ,  $WF_{QW}$ , and  $E_F$  are the work function of graphene, the work function of QW, and the Fermi energy level, respectively.  $d_{\phi}$  is the effective barrier distance between QW and graphene that can be extracted by  $d_{\phi} = W_{cap} + L_B$  with  $W_{cap} = 10, 20, 30,$  and  $50$  nm and barrier width ( $L_B$ ) =  $11$  nm. The well width ( $L_W$ ) is  $2.5$  nm, where  $d_{\phi}$ ,  $L_W$ , and energy band gap  $E_G$  with subscripts  $0$  and  $1$  indicate each value for bare QW and graphene/QW, respectively. Here, the work functions of graphene ( $WF_{G0}$ ) and QW ( $WF_{QW}$ ) are employed at  $\sim 4.6$  eV [40] and  $\sim 4.1$  eV [41, 42], respectively.

40. Yu, Y. -J.; Zhao, Y.; Ryu, S.; Brus, L. E.; Kim, K. S.; Kim, P. Tuning the graphene work function by electric field effect. *Nano Lett.* **2009**, *9*, 3430-3434.

41. Pankove, J. I.; Schade, H. Photoemission from GaN. *App. Phys. Lett.* **1974**, *25*, 53-55.

42. Foresi, J. S.; Moustakas, T. D. Metal contacts to gallium nitride. *App. Phys. Lett.* **1993**, *62*, 2959-2861.

## 5. Temperature dependent PL decay times of QLG/QW and bare QW.

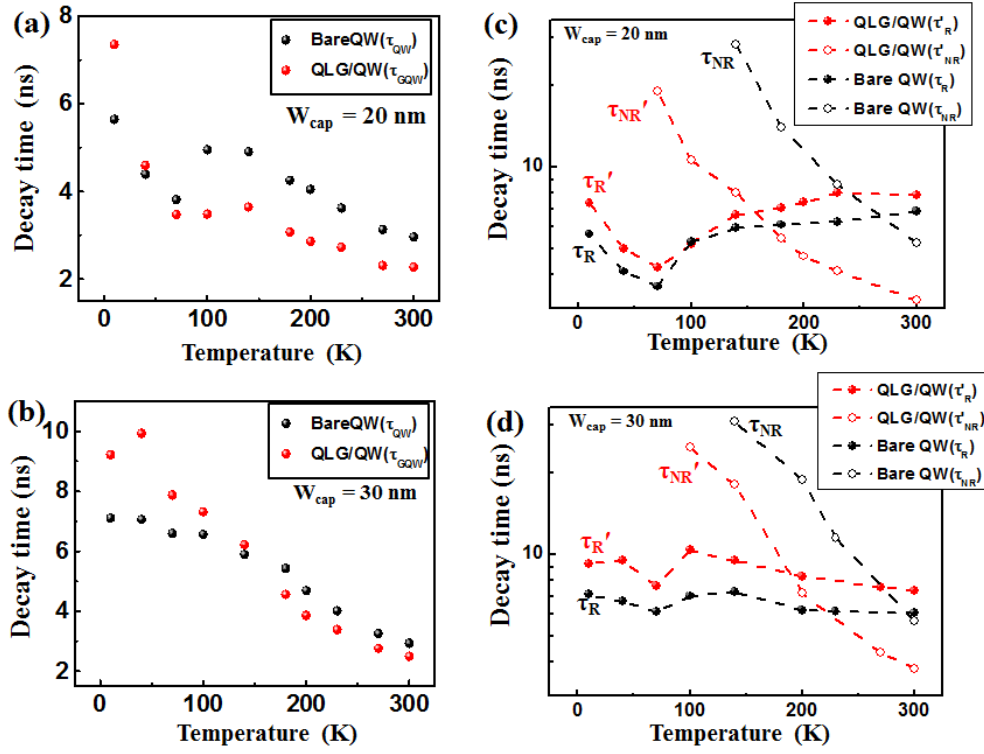

**Figure S5.** PL decay times of bare QW ( $\tau_{QW}$ ) and QLG/QW ( $\tau_{GQW}$ ) for  $W_{cap} =$  (a) 20 nm and (b) 30 nm as a function of T (10 ~ 300 K). (c, d) Radiative and nonradiative recombination times as a function of T extracted from (a) and (b) with  $\tau_R = \tau_{QW} \times (I_{10}/I)$ ,  $\tau_{NR} = \tau_{QW} \times (I_{10}/\Delta I)$ ,  $\tau_R' = \tau_{GQW} \times (I_{10}/I)$ , and  $\tau_{NR}' = \tau_{GQW} \times (I_{10}/\Delta I)$ , respectively, where I,  $I_{10}$ , and  $\Delta I$  are the PL intensity at each temperature, PL intensity at 10 K, and PL intensity variation as a function of T, respectively. Here, the time axis is a logarithmic scale.

## 6. Internal quantum efficiency of QLG/QW and bare QW.

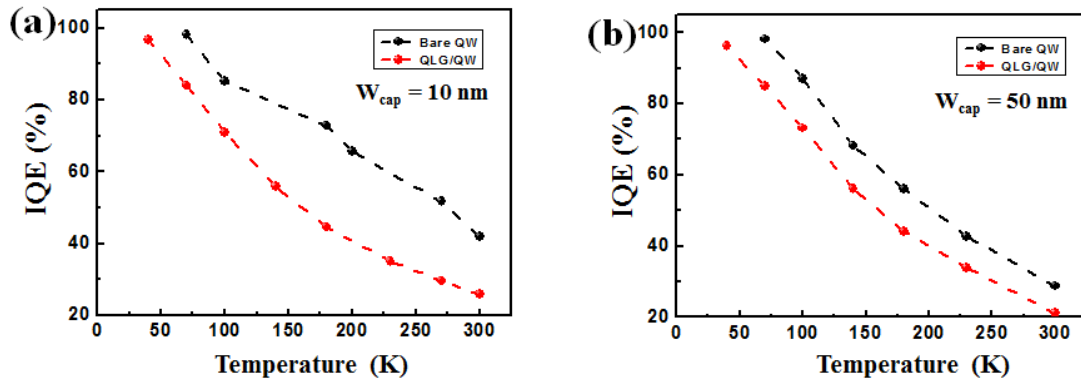

**Figure S6.** Internal quantum efficiency (IQE) of QLG/QW and bare QW with (a)  $W_{cap} = 10$



nm and (b) 50 nm as a function of T. The IQE can be evaluated using  $\text{IQE}_{\text{GQW}} = \tau_{\text{NR}}' / (\tau_{\text{R}}' + \tau_{\text{NR}}')$  for QLG/QW and  $\text{IQE}_{\text{QW}} = \tau_{\text{NR}} / (\tau_{\text{R}} + \tau_{\text{NR}})$  for bare QW, respectively.

## 7. Energy transfer between QLG and QW under different temperatures

The PL decay time of the bare QW and QLG/QW expressed as  $\tau_{\text{QW}}^{-1} = \tau_{\text{R}}^{-1} + \tau_{\text{NR}}^{-1}$  and  $\tau_{\text{GQW}}^{-1} = \tau_{\text{R}}^{-1} + \tau_{\text{NR}}^{-1} + \tau_{\text{ET}}^{-1}$ , respectively, leads to  $\tau_{\text{ET}}^{-1} = \tau_{\text{GQW}}^{-1} - \tau_{\text{QW}}^{-1}$ , where  $\tau_{\text{R}}$  and  $\tau_{\text{NR}}$  are the radiative and nonradiative decay times, respectively, and  $\tau_{\text{ET}}$  is the characteristic time of the energy transfer process. Thus, the energy transfer efficiency  $\eta_{\text{ET}}$  could be expressed as  $\eta_{\text{ET}} = \tau_{\text{ET}}^{-1} / (\tau_{\text{QW}}^{-1} + \tau_{\text{ET}}^{-1}) = 1 - (\tau_{\text{GQW}} / \tau_{\text{QW}})$ . Upon employing  $\eta_{\text{ET}}$  as a function of T, the negative values of  $\eta_{\text{ET}}$  are occasionally measured under low T as represented in yellow in Fig. S7. Here  $\eta_{\text{ET}}$  as a function of T in Fig. S7a and S7b is yielded with a fast ( $\tau_1$ ) and a slow ( $\tau_2$ ) component from the PL decay curves expressed by a two-exponential function,  $A_1 \exp(-t/\tau_1) + A_2 \exp(-t/\tau_2)$ , respectively. This might have originated from the supplemented extra carriers to QW from undesirable energy states, such as residues at the interface between graphene and QW or impurities in QW under  $T < 40$  K after the saturation of the excited exciton population in QLG/QW, as extracted IQE in Fig. S6. Even the onset of rapidly increasing  $\tau_{\text{GQW}}$  for  $W_{\text{cap}}=30$  nm could also be observed from around 150 K (see also Figs. 1d, S5b and 5d). Therefore, for the RET studies without the unexpected influences in this work, the temperature range was restricted to  $40 \text{ K} \leq T \leq 300 \text{ K}$ . In addition, the negative value of  $\eta_{\text{ET}}$  for  $W_{\text{cap}} = 10, 20$ , and 30 nm resulting from a longer  $\tau_{\text{GQW}}$  than  $\tau_{\text{QW}}$  as shown in Figs. 2c, S5a and S5b, corresponding to a longer  $\tau_{\text{R}}'$  than  $\tau_{\text{R}}$  are overlooked. The neglected area is presented in pink as shown in Fig. S7. Finally, we choose two trends for  $W_{\text{cap}}=(\text{I}) 10$  nm and (II) 50 nm under  $40 \text{ K} \leq T \leq 300 \text{ K}$  to discuss the RET behavior shown in Fig. 3.

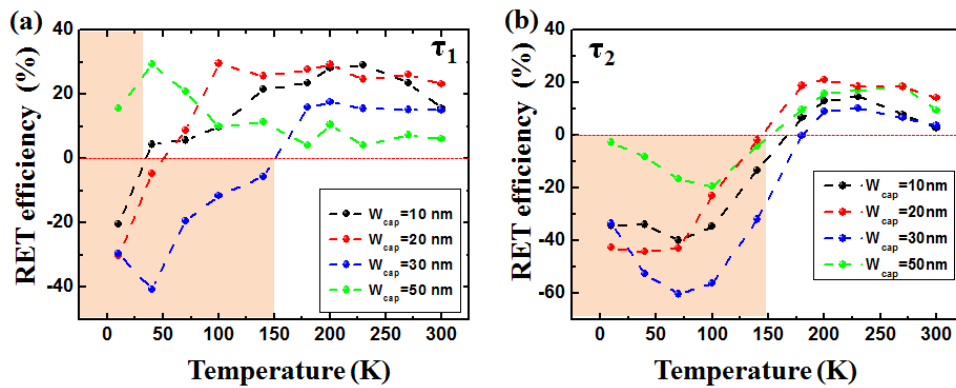

**Figure S7.** Energy transfer efficiency between QLG and QW extracted with (a) a fast ( $\tau_1$ ) and (b) a slow ( $\tau_2$ ) component from the PL decay curves under different T and cap-layer thickness of  $W_{\text{cap}} = 10, 20, 30$  and  $50$  nm. Here pink area indicates the negative values of  $\eta_{\text{ET}}$  ( $\tau_{\text{QLG}} > \tau_{\text{QW}}$ ) for QLG/QW and  $T < 40$  K for all data.
